# Supplementary material for: Public Willingness to Pay to Improve Services for Individuals With Serious Mental Illness
Source: Atypon-hosted journal article supplement (doi:10.1176/appi.ps.201800043), 2018-05-08
Supplement: appi.ps.201800043.ds001.pdf [file appi.ps.201800043.ds001.pdf]

## Online Appendix. Unweighted and weighted survey sample compared to U.S. population, 2017

|                             | <b>Unweighted</b> | <b>Weighted</b> | <b>National Comparison<sup>1</sup></b> |
|-----------------------------|-------------------|-----------------|----------------------------------------|
| Female (%)                  | 51.1              | 51.6            | 51.6                                   |
| Age (%)                     |                   |                 |                                        |
| 18-29                       | 16.6              | 21.1            | 21.3                                   |
| 30-44                       | 20.0              | 25.0            | 25.1                                   |
| 45-59                       | 28.2              | 26.0            | 26.3                                   |
| 60+                         | 35.2              | 27.9            | 27.3                                   |
| Race/Ethnicity (%)          |                   |                 |                                        |
| White, non-Hispanic         | 72.4              | 64.0            | 64.4                                   |
| Black, non-Hispanic         | 7.8               | 11.8            | 11.9                                   |
| Other, non-Hispanic         | 7.1               | 8.3             | 8.0                                    |
| Hispanic                    | 12.7              | 15.9            | 15.7                                   |
| Education (%)               |                   |                 |                                        |
| Less than high school       | 7.7               | 8.3             | 11.7                                   |
| High school                 | 31.5              | 31.6            | 29.0                                   |
| Some college                | 25.9              | 28.6            | 28.7                                   |
| Bachelor's degree or higher | 34.9              | 31.5            | 30.7                                   |
| Household income (%)        |                   |                 |                                        |
| Under \$25,000              | 13.2              | 15.0            | 16.1                                   |
| \$25,000-\$49,999           | 19.0              | 19.8            | 20.5                                   |
| \$50,000-\$74,999           | 17.8              | 17.4            | 17.3                                   |
| \$75,000 or higher          | 50.0              | 47.8            | 46.1                                   |
| Employment status (%)       |                   |                 |                                        |
| Employed                    | 62.5              | 64.2            | 61.3                                   |
| Unemployed                  | 4.1               | 5.2             | 3.2                                    |
| Other                       | 33.5              | 30.6            | 35.5                                   |

|                                 |      |      |      |
|---------------------------------|------|------|------|
| Region (%)                      |      |      |      |
| Northeast                       | 18.6 | 17.8 | 17.9 |
| Midwest                         | 22.3 | 20.8 | 21.0 |
| South                           | 36.1 | 37.7 | 37.5 |
| West                            | 23.0 | 23.7 | 23.6 |
| Political Party Affiliation (%) |      |      |      |
| Republican                      | 27.5 | 25.0 | 29.5 |
| Independent                     | 39.4 | 39.7 | 33.8 |
| Democrat                        | 33.1 | 35.4 | 36.7 |

<sup>1</sup>All data taken from the Current Population Survey, with the exception of political party affiliation taken from the American National Election Study
